# Supplementary material for: t(14;16)-positive multiple myeloma shows negativity for CD56 expression and unfavorable outcome even in the era of novel drugs
Source: PubMed Central journal article supplement (PMC4349263; doi:10.1038/bcj.2015.6), 2015-02-27
Supplement: bcj20156x2.pdf [file bcj20156x2.pdf]

Figure S1

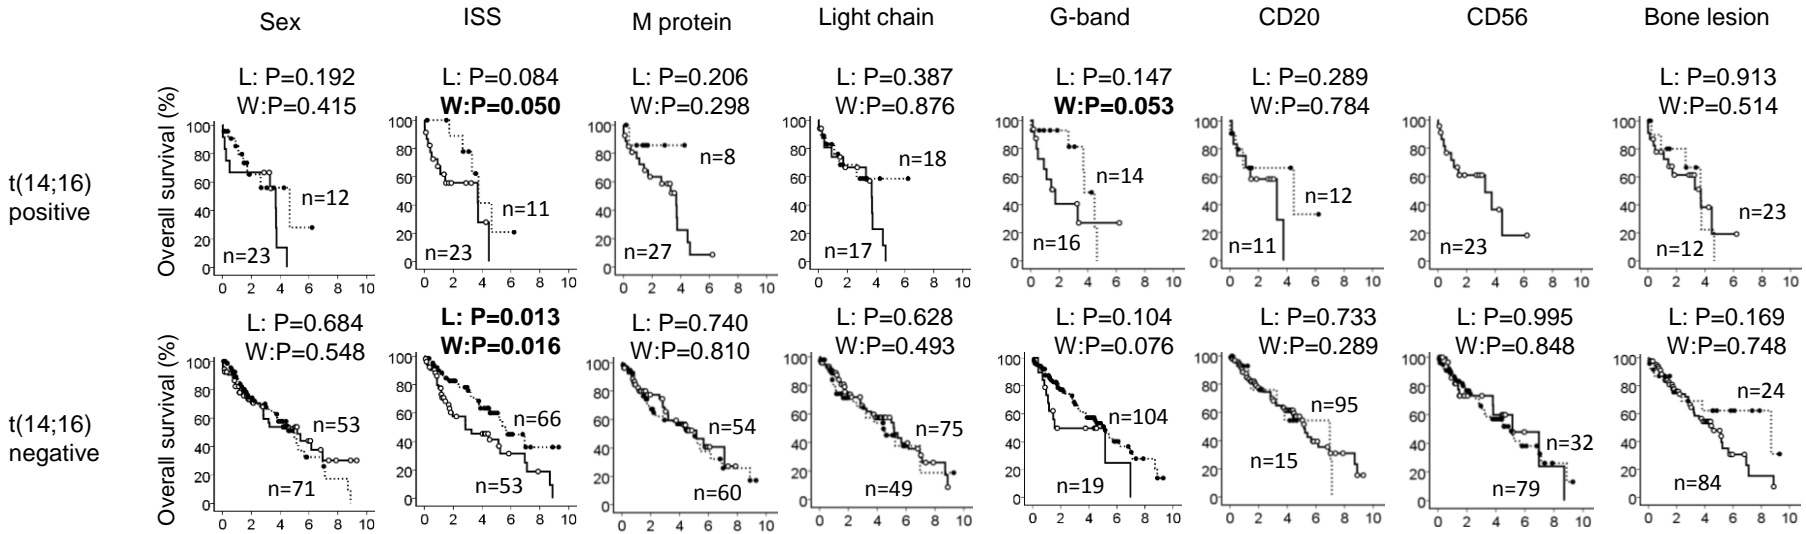

— Male  
 ..... female  
 Stage III  
 Stage I / II  
 IgG  
 non-IgG  
 K  
 λ  
 abnormal  
 normal  
 positive  
 negative  
 positive  
 negative  
 positive  
 negative

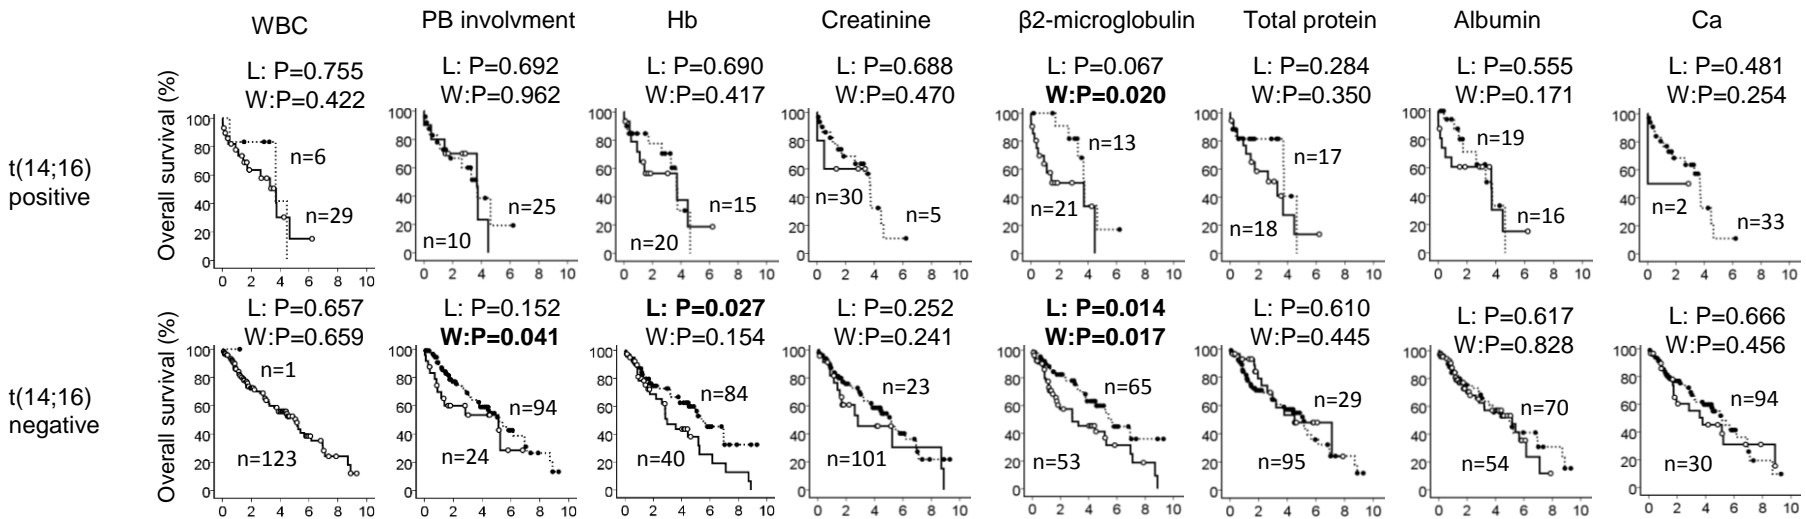

— ≤10000 /μL  
 ..... > 10000 /μL  
 positive  
 negative  
 < 8.5 g/dL  
 ≥ 8.5 g/dL  
 > 2.0 mg/dL  
 ≤ 2.0 mg/dL  
 ≥ 3.5 mg/L  
 < 3.5 mg/L  
 ≥ 10 g/dL  
 < 10 g/dL  
 <3.5 g/dL  
 ≥3.5 g/dL  
 > 11 mg/dL  
 ≤ 11 mg/dL
