# Supplementary material for: t(14;16)-positive multiple myeloma shows negativity for CD56 expression and unfavorable outcome even in the era of novel drugs
Source: PubMed Central journal article supplement (PMC4349263; doi:10.1038/bcj.2015.6), 2015-02-27

Figure S2

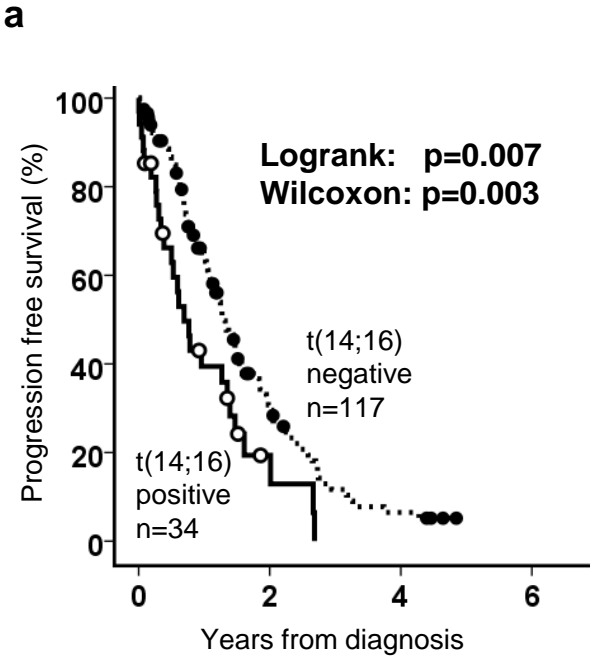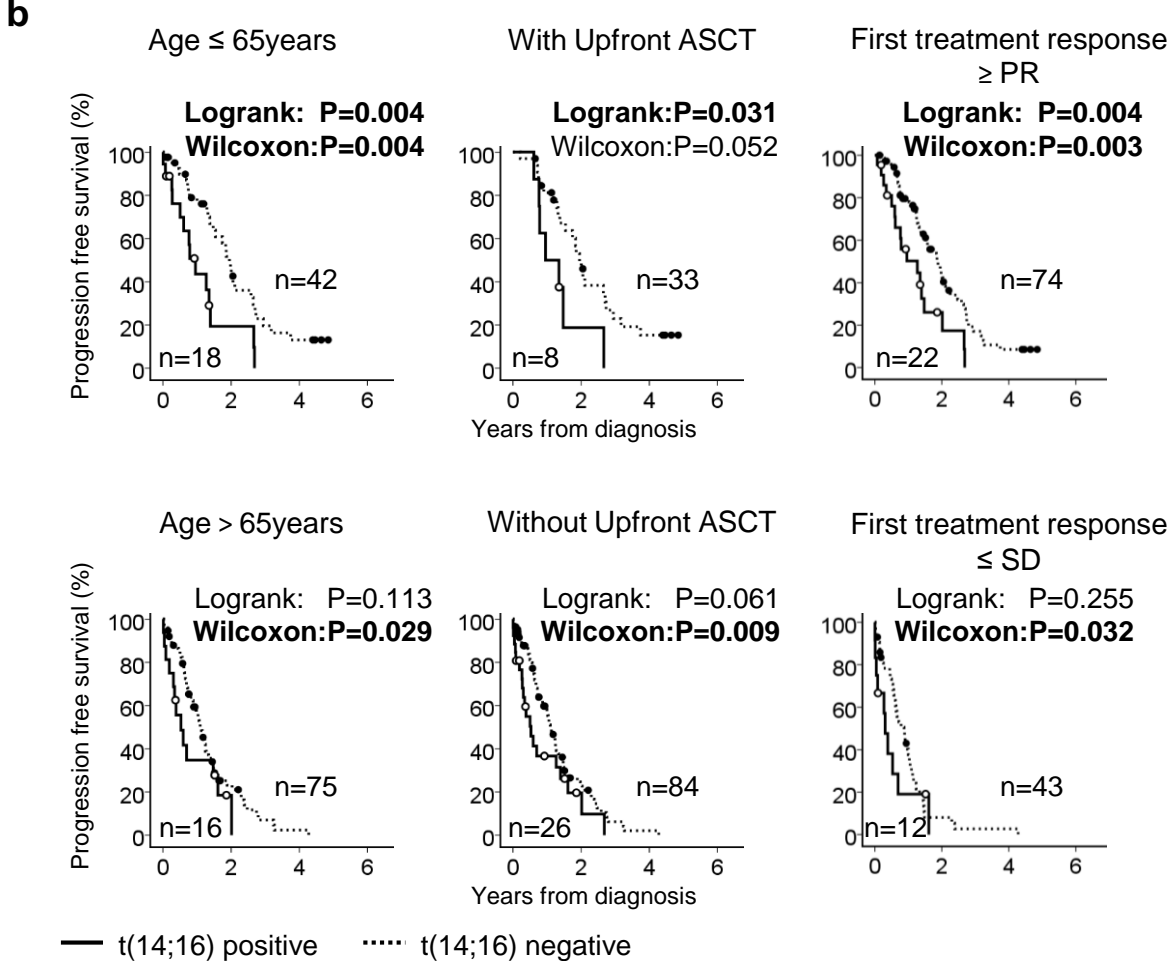

Supplement: bcj20156x3.pdf [file bcj20156x3.pdf]
